# Supplementary material for: Predictive role of systemic immune-inflammation index in the prognosis of patients with advanced left-sided colorectal cancer: a retrospective study
Source: PeerJ. 2025 Oct 6;13:e20095. doi: 10.7717/peerj.20095 (PMC12510246; doi:10.7717/peerj.20095)
Supplement: Supplemental Information 1 [file peerj-13-20095-s001.xlsx]

## Sheet: rawdata
ID	TREAT	TREAT1(CAPEOX+BEV_1/CAPEOX_0)	OS	CENSOR(DEATH_1/LIVE_0)	NLR	PLR	MLR	SII	NLR(≤2.8_0/>2.8_1)	PLR(≤184.4_0/>184.4_1)	MLR(≤0.2_0/>0.2_1)	SII(≤1424.8_0/>1424.8_1)	AGE(≤67_0/>67_1)	BMI(≤20_0/>20_1)	AGE	SEX(male_1/female_0)	BMI	KNB(WILD_0/MUTATE_1/UNKNOWN_2)	Site of Metastasis(Limited to Liver _0/NOT Limited to Liver_1)	Primary Tumor Resection(NO_0/YES_1)	Prior Adjuvant Therapy(NO_0/YES_1)	second-line treatment	Third-Line and Subsequent Therapy
1	CAPEOX+BEV	1	1582	0	2.31638	87.0056	0.158192	356.723	0	0	0	0	0	1	58	1	26.1962	0	0	0	0	chemotherapy+targeted Therapy
2	CAPEOX	0	497	0	1.55738	122.131	0.196721	232.049	0	0	0	0	1	0	72	1	19.1953	2	1	0	0	chemotherapy+targeted Therapy
3	CAPEOX+BEV	1	318	1	2.45714	105.714	0.290476	545.486	0	0	1	0	0	1	52	1	25.8586	0	0	0	0
4	CAPEOX	0	1931	1	1.20603	70.3518	0.140704	168.844	0	0	0	0	1	0	70	1	19.5918	0	0	1	0
5	CAPEOX+BEV	1	353	0	2.09565	152.174	0.269565	366.739	0	0	1	0	0	1	61	1	25.9959	1	0	1	1
6	CAPEOX+BEV	1	1481	0	1.54396	143.407	0.302198	402.973	0	0	1	0	0	1	66	1	20.7612	2	1	1	0
7	CAPEOX+BEV	1	1724	1	4.06195	96.4602	0.486726	442.752	1	0	1	0	1	1	71	1	20.5191	1	1	0	0
8	CAPEOX	0	1720	1	2.68362	77.4011	0.305085	367.655	0	0	1	0	0	1	64	1	25.1825	2	1	0	0	chemotherapy	chemotherapy+targeted therapy
9	CAPEOX	0	921	0	2.70968	98.0645	0.36129	411.871	0	0	1	0	0	1	50	1	23.6324	0	1	1	0	chemotherapy+targeted Therapy	chemotherapy+targeted Therapy
10	CAPEOX+BEV	1	841	1	1.96226	109.434	0.18239	341.434	0	0	0	0	0	0	55	1	18.6851	1	1	0	0	chemotherapy+targeted Therapy	chemotherapy+targeted Therapy
11	CAPEOX+BEV	1	1256	1	3.41606	205.109	0.284672	959.912	1	1	1	0	0	1	56	1	24.1633	1	1	0	0
12	CAPEOX	0	378	1	1.40351	62.807	0.164912	251.228	0	0	0	0	0	0	65	1	17.6309	2	1	0	0
13	CAPEOX+BEV	1	2036	0	1.73856	103.268	0.222222	274.693	0	0	1	0	0	1	57	1	26.4915	1	1	1	0
14	CAPEOX+BEV	1	1218	1	4.79747	363.291	0.481013	1376.87	1	1	1	0	1	1	77	1	24.2215	1	1	0	0	chemotherapy+targeted Therapy	Targeted Therapy
15	CAPEOX	0	432	1	5.61314	117.518	0.321168	903.715	1	0	1	0	0	1	57	0	20.9572	2	1	1	0
16	CAPEOX	0	729	1	4.16239	180.342	0.324786	878.265	1	0	1	0	0	0	57	1	14.317	2	1	0	0	chemotherapy+targeted Therapy
17	CAPEOX+BEV	1	976	1	1.33745	150.617	0.201646	489.506	0	0	1	0	0	1	64	0	20.4444	1	1	0	0	chemotherapy+targeted Therapy
18	CAPEOX	0	482	1	2.5	148	0.166667	555	0	0	0	0	0	1	54	0	27.2173	2	0	0	0	chemotherapy+targeted Therapy
19	CAPEOX	0	1304	1	1.06897	128.276	0.172414	198.828	0	0	0	0	0	1	47	1	24.8163	0	1	1	0	chemotherapy+targeted Therapy
20	CAPEOX+BEV	1	466	0	1.40865	83.1731	0.115385	243.697	0	0	0	0	1	1	71	1	22.1593	0	1	1	1
21	CAPEOX	0	447	1	3.32796	184.409	0.473118	1141.49	1	1	1	0	1	1	69	1	23.3067	2	0	0	0	chemotherapy
22	CAPEOX	0	460	1	2.16279	118.023	0.133721	439.047	0	0	0	0	1	1	80	0	20.1951	1	1	1	0
23	CAPEOX+BEV	1	643	1	4.88889	228.148	0.488889	1505.78	1	1	1	1	0	0	41	1	16.606	1	0	0	0
24	CAPEOX	0	198	1	2.56618	142.647	0.191176	497.838	0	0	0	0	0	0	65	1	17.301	2	1	0	0
25	CAPEOX	0	1038	1	1.74419	98.6047	0.181395	369.767	0	0	0	0	1	0	69	0	19.313	2	1	0	0
26	CAPEOX	0	147	1	5.61818	265.455	0.409091	1640.51	1	1	1	1	1	1	68	1	23.3234	1	1	0	0
27	CAPEOX	0	2349	0	2.50917	161.009	0.288991	880.72	0	0	1	0	0	1	60	1	24.093	2	0	0	0
28	CAPEOX	0	1052	1	0.793103	53.6946	0.123153	86.4483	0	0	0	0	0	1	65	1	25.0284	1	0	1	0	chemotherapy+targeted Therapy	chemotherapy+targeted Therapy
29	CAPEOX+BEV	1	378	1	6.80531	200	0.699115	1538	1	1	1	1	1	1	72	0	30.6008	1	1	0	0
30	CAPEOX	0	3096	1	2.51042	124.479	0.177083	599.99	0	0	0	0	0	0	59	1	19.0311	1	0	1	0	chemotherapy+targeted Therapy
31	CAPEOX	0	175	0	2.12376	78.7129	0.113861	337.678	0	0	0	0	0	1	61	1	27.4145	1	0	0	0	chemotherapy+targeted Therapy
32	CAPEOX+BEV	1	633	1	6.07273	260.909	0.345455	1742.87	1	1	1	1	0	1	62	1	24.0741	1	1	1	1	chemotherapy+targeted Therapy
33	CAPEOX	0	679	1	1.95918	65.8163	0.204082	252.735	0	0	1	0	0	1	53	1	20.5151	2	1	1	0	chemotherapy+targeted Therapy	chemotherapy+targeted Therapy
34	CAPEOX	0	1821	0	2.01667	173.333	0.233333	419.467	0	0	1	0	0	1	66	1	23.6915	1	1	1	0	chemotherapy+targeted Therapy	chemotherapy+targeted Therapy
35	CAPEOX+BEV	1	397	1	1.1791	82.0896	0.358209	129.701	0	0	1	0	1	1	71	1	20.0474	1	1	1	1	chemotherapy+targeted Therapy
36	CAPEOX	0	120	1	5.15625	441.667	0.708333	2186.25	1	1	1	1	0	0	40	1	17.301	1	1	1	0
37	CAPEOX+BEV	1	670	0	2.33099	130.282	0.161972	431.232	0	0	0	0	1	1	74	0	22.9421	1	1	1	1	chemotherapy+targeted Therapy	Targeted Therapy
38	CAPEOX	0	1459	0	1.5	128.916	0.168675	321	0	0	0	0	0	1	42	1	21.6263	2	1	1	0
39	CAPEOX	0	659	1	2.47727	194.886	0.25	849.705	0	1	1	0	0	1	54	1	31.5115	2	1	1	0
40	CAPEOX	0	856	0	2.97938	159.794	0.226804	461.804	1	0	1	0	0	1	62	0	20.2395	2	1	1	1
41	CAPEOX	0	1768	0	1.21898	105.839	0.167883	176.752	0	0	0	0	0	0	43	0	17.9688	1	1	1	0	chemotherapy+targeted Therapy
42	CAPEOX	0	514	1	2.73171	191.057	0.227642	641.951	0	1	1	0	0	1	63	1	21.883	2	0	0	0
43	CAPEOX	0	167	0	3.26154	132.308	0.307692	560.985	1	0	1	0	0	1	35	1	24.1633	2	1	0	0
44	CAPEOX	0	1053	1	2.69697	127.706	0.203463	795.606	0	0	1	0	0	1	51	0	24.0346	2	1	0	0	chemotherapy	Targeted Therapy
45	CAPEOX	0	1734	0	1.01629	69.0554	0.14658	215.453	0	0	0	0	0	1	67	0	23.2816	2	1	1	0
46	CAPEOX	0	126	0	2.38503	194.652	0.203209	868.15	0	1	1	0	0	1	46	1	22.8571	2	1	1	0
47	CAPEOX+BEV	1	357	1	3.88079	188.742	0.278146	1106.03	1	1	1	0	0	1	64	1	24.4646	1	1	0	0
48	CAPEOX+BEV	1	1896	1	2.2	86.0606	0.284848	312.4	0	0	1	0	1	1	73	0	26.6667	1	1	1	1
49	CAPEOX	0	715	1	2.49265	265.441	0.323529	899.846	0	1	1	0	0	0	63	0	19.5312	2	0	1	0	chemotherapy+targeted Therapy	Targeted Therapy
50	CAPEOX+BEV	1	2051	0	1	99.4083	0.106509	168	0	0	0	0	1	1	70	0	20.9572	1	0	1	0
51	CAPEOX+BEV	1	151	1	4.34483	199.31	0.503448	1255.66	1	1	1	0	1	1	69	1	26.1593	0	1	0	0	chemotherapy+targeted Therapy
52	CAPEOX+BEV	1	1780	0	2.7757	169.159	0.364486	502.402	0	0	1	0	1	1	75	1	28.125	1	1	1	1	chemotherapy+targeted Therapy	Targeted Therapy
53	CAPEOX	0	648	1	2.87156	189.908	0.192661	594.413	1	1	0	0	0	1	61	1	22.913	2	0	1	0
54	CAPEOX	0	458	0	1.89516	138.71	0.225806	325.968	0	0	1	0	0	1	43	0	20.3383	1	1	1	0	chemotherapy
55	CAPEOX+BEV	1	860	1	3.64286	228.571	0.446429	932.571	1	1	1	0	1	1	79	1	27.8401	1	0	0	0	chemotherapy+targeted Therapy	Targeted Therapy
56	CAPEOX	0	1657	0	2.97273	218.182	0.418182	713.455	1	1	1	0	0	1	65	1	20.0474	2	0	0	0	chemotherapy+targeted Therapy
57	CAPEOX	0	294	0	5.61111	333.333	0.555556	673.333	1	1	1	0	0	1	49	1	21.2585	2	1	1	0
58	CAPEOX	0	2058	1	3.14516	145.699	0.231183	852.339	1	0	1	0	0	1	55	0	28.306	2	1	0	0
59	CAPEOX+BEV	1	172	1	2.93939	185.606	0.234848	720.152	1	1	1	0	1	0	78	0	19.5184	2	1	1	0
60	CAPEOX	0	192	1	1.53043	153.913	0.13913	270.887	0	0	0	0	1	0	70	0	19.5556	0	0	0	0
61	CAPEOX	0	1270	1	1.51073	57.5107	0.188841	202.438	0	0	0	0	0	0	48	1	19.2672	0	1	1	1	chemotherapy+targeted Therapy	Targeted Therapy
62	CAPEOX	0	1417	1	3.23077	199.038	0.192308	668.769	1	1	0	0	0	1	63	1	25.7117	2	1	0	0
63	CAPEOX+BEV	1	2170	1	2.54088	149.057	0.194969	602.189	0	0	0	0	0	1	65	1	22.9568	0	1	1	0	chemotherapy	Targeted Therapy
64	CAPEOX	0	2816	1	3.03468	184.393	0.352601	968.064	1	0	1	0	1	1	79	1	25.8806	2	1	1	0	chemotherapy
65	CAPEOX+BEV	1	915	1	3.58095	220.952	0.27619	830.781	1	1	1	0	0	0	57	0	18.902	0	1	1	1	chemotherapy+targeted Therapy
66	CAPEOX	0	1116	0	2.0098	97.0588	0.176471	198.971	0	0	0	0	1	0	74	1	19.1448	2	1	1	0	chemotherapy	chemotherapy+targeted therapy
67	CAPEOX	0	2374	1	1.71812	215.436	0.127517	551.517	0	1	0	0	0	0	59	1	17.8359	2	1	1	0	chemotherapy+targeted Therapy
68	CAPEOX+BEV	1	1613	0	2.00985	123.645	2.26601	504.473	0	0	1	0	0	1	48	1	26.9388	2	1	1	0
69	CAPEOX+BEV	1	2050	1	2.13913	88.6957	0.4	218.191	0	0	1	0	1	1	76	1	24.3945	2	0	1	0
70	CAPEOX	0	644	0	3.39823	199.115	0.256637	764.602	1	1	1	0	0	1	40	1	23.1834	1	1	0	0	chemotherapy	chemotherapy+targeted therapy
71	CAPEOX	0	1220	1	3.0203	98.4772	0.258883	585.939	1	0	1	0	0	1	65	1	23.8751	2	1	1	0	chemotherapy+targeted Therapy	Targeted Therapy+Immunotherapy
72	CAPEOX	0	1679	1	3.5	176.119	0.358209	826	1	0	1	0	0	1	51	1	21.9671	0	0	1	0	chemotherapy
73	CAPEOX	0	942	1	6.56589	168.217	0.542636	1424.8	1	0	1	0	0	1	67	1	23.1481	2	1	0	0
74	CAPEOX	0	1262	1	2.47664	200.935	0.233645	532.477	0	1	1	0	1	1	69	0	23.8751	2	1	1	0	chemotherapy+targeted Therapy	Targeted Therapy
75	CAPEOX	0	735	1	0.84022	98.3471	0.203857	299.959	0	0	1	0	0	0	45	1	18.5911	2	1	0	0	chemotherapy	chemotherapy+targeted therapy
76	CAPEOX	0	1318	1	4.74576	143.22	0.20339	802.034	1	0	1	0	0	0	46	1	19.6052	2	0	0	0	chemotherapy+targeted Therapy	chemotherapy+targeted Therapy
77	CAPEOX	0	472	1	3.45752	118.301	0.313725	625.81	1	0	1	0	1	1	71	0	24.974	2	1	1	1
78	CAPEOX	0	1744	1	2.00549	167.582	0.230769	611.676	0	0	1	0	0	1	60	1	21.551	2	1	0	0	chemotherapy	chemotherapy+targeted therapy
79	CAPEOX	0	168	1	1.21364	120	0.163636	320.4	0	0	0	0	0	1	50	0	28.9811	2	0	0	0
80	CAPEOX	0	63	1	2.40179	245.536	0.410714	660.491	0	1	1	0	1	1	71	1	20.0184	2	1	1	0	chemotherapy+targeted Therapy
81	CAPEOX	0	120	0	1.95122	196.951	0.152439	630.244	0	1	0	0	0	1	49	0	22.1893	2	1	1	0
82	CAPEOX+BEV	1	610	0	2.92593	144.444	0.212963	456.444	1	0	1	0	1	1	68	0	28.3941	0	1	1	1
83	CAPEOX	0	2446	1	1.59669	71.8232	0.149171	207.569	0	0	0	0	0	1	57	1	27.102	0	0	1	0
84	CAPEOX	0	110	1	11.8088	361.765	1.04412	2904.97	1	1	1	1	1	0	73	1	19.1953	1	0	1	0
85	CAPEOX	0	1164	1	2.68421	165.497	0.175439	759.632	0	0	0	0	1	1	75	0	27.1203	2	1	0	0
86	CAPEOX+BEV	1	1788	0	1.73585	179.245	0.188679	329.811	0	0	0	0	1	1	77	1	22.0386	1	1	1	0
87	CAPEOX	0	1294	1	1.9292	92.0354	0.247788	200.637	0	0	1	0	0	1	40	0	21.83	2	1	1	0	chemotherapy+targeted Therapy	Targeted Therapy
88	CAPEOX+BEV	1	383	1	3.85057	240.23	0.436782	1609.54	1	1	1	1	1	1	72	1	22.5827	1	1	0	0	chemotherapy+targeted Therapy	Targeted Therapy+Immunotherapy
89	CAPEOX+BEV	1	1452	1	2.21429	121.978	0.252747	491.571	0	0	1	0	1	1	70	0	26.3465	1	0	1	0	chemotherapy+targeted Therapy
90	CAPEOX	0	2047	1	1.58108	108.108	0.195946	252.973	0	0	0	0	0	1	66	1	21.0667	0	1	1	0	chemotherapy
91	CAPEOX+BEV	1	1949	0	1.22513	89.5288	0.183246	209.497	0	0	0	0	0	1	65	1	26.2188	2	0	1	0	chemotherapy+targeted Therapy
92	CAPEOX	0	1000	1	1.69853	97.7941	0.301471	225.904	0	0	1	0	1	1	69	1	24.4646	2	0	0	0	chemotherapy+targeted Therapy	Targeted Therapy
93	CAPEOX+BEV	1	714	1	3.0597	142.537	0.238806	584.403	1	0	1	0	1	1	72	1	25.9516	1	0	0	0	chemotherapy+targeted Therapy	Targeted Therapy
94	CAPEOX	0	883	1	7.9863	223.288	0.794521	1301.77	1	1	1	0	0	1	58	1	21.9671	1	1	0	0	chemotherapy
95	CAPEOX+BEV	1	894	1	1.81667	156.111	0.15	510.483	0	0	0	0	0	1	65	1	23.4256	1	0	0	0
96	CAPEOX	0	865	1	2.12245	197.279	0.183673	615.51	0	1	0	0	1	1	74	1	26.6193	2	1	1	0
97	CAPEOX	0	1394	0	0.943925	124.766	0.116822	252.028	0	0	0	0	0	1	66	1	20.9042	1	1	1	0	chemotherapy+targeted Therapy	chemotherapy+targeted Therapy
98	CAPEOX	0	172	1	3.23077	126.154	0.376923	529.846	1	0	1	0	0	1	57	1	24.9796	0	1	0	0	chemotherapy
99	CAPEOX	0	2692	0	1.68103	139.224	0.198276	542.974	0	0	0	0	0	1	36	1	21.2245	2	1	0	0
100	CAPEOX+BEV	1	618	1	3.9899	173.737	0.535354	686.263	1	0	1	0	0	1	61	1	22.4609	0	1	0	0
101	CAPEOX+BEV	1	586	1	4.3125	133.929	0.348214	646.875	1	0	1	0	1	1	70	1	23.7097	2	1	0	0
102	CAPEOX	0	1374	0	1.14015	78.0303	0.151515	234.871	0	0	0	0	0	1	52	1	25.8645	0	0	1	0
103	CAPEOX+BEV	1	725	1	2.15172	116.552	0.227586	363.641	0	0	1	0	1	1	75	1	23.1405	1	1	1	0	chemotherapy+targeted Therapy	Targeted Therapy+Immunotherapy
104	CAPEOX+BEV	1	1532	1	4	266.154	0.430769	692	1	1	1	0	0	1	67	0	22.5896	1	1	1	1
105	CAPEOX	0	1151	1	3.03636	164.545	0.454545	549.582	1	0	1	0	1	1	73	1	23.0078	2	1	1	1	chemotherapy	Targeted Therapy
106	CAPEOX+BEV	1	421	1	1.41434	106.773	0.187251	379.044	0	0	0	0	1	0	76	0	19.9792	1	0	1	0
107	CAPEOX+BEV	1	1605	1	1.73684	205.263	0.166667	406.421	0	1	0	0	1	1	68	0	22.4766	1	1	1	0	chemotherapy+targeted Therapy	Targeted Therapy+Immunotherapy
108	CAPEOX	0	1690	0	1.81538	113.846	0.2	268.677	0	0	0	0	0	1	41	1	20.4997	2	0	1	1	chemotherapy+targeted Therapy	Targeted Therapy
109	CAPEOX	0	1867	1	1.34848	95.8333	0.143939	341.167	0	0	0	0	1	1	68	1	21.6713	0	0	1	0	chemotherapy
110	CAPEOX+BEV	1	467	1	3.72222	271.296	0.259259	1090.61	1	1	1	0	1	1	70	0	21.7784	1	1	0	0
111	CAPEOX+BEV	1	738	1	1.46324	105.882	0.272059	210.706	0	0	1	0	0	1	58	0	24.6528	2	1	1	1	chemotherapy	chemotherapy+targeted Therapy
112	CAPEOX	0	2137	0	1.06936	109.827	0.115607	203.179	0	0	0	0	0	1	61	0	26.6389	2	0	1	1
113	CAPEOX+BEV	1	217	0	1.29189	70.8108	0.194595	169.238	0	0	0	0	1	1	71	1	24.9135	1	1	1	1
114	CAPEOX+BEV	1	124	0	6.96154	141.026	0.487179	2297.31	1	0	1	1	0	1	43	1	26.2346	0	1	0	0
115	CAPEOX+BEV	1	1048	1	3.33796	231.019	0.453704	1665.64	1	1	1	1	0	0	44	1	15.1837	1	1	1	1
116	CAPEOX+BEV	1	442	1	1.91209	165.385	0.208791	575.538	0	0	1	0	1	1	70	0	20.0288	1	1	1	0
117	CAPEOX+BEV	1	659	1	0.851675	50.2392	0.210526	89.4258	0	0	1	0	1	1	78	1	22.4913	1	0	1	0	Immunotherapy
118	CAPEOX+BEV	1	1174	1	3.64706	179.085	0.24183	999.294	1	0	1	0	0	1	53	1	27.0416	0	1	1	1
119	CAPEOX+BEV	1	539	1	2.89362	127.66	0.244681	347.234	1	0	1	0	1	1	69	1	21.6713	1	1	1	0	chemotherapy+targeted Therapy	Targeted Therapy
120	CAPEOX	0	642	1	0.972826	97.8261	0.157609	175.109	0	0	0	0	1	1	68	1	26.6436	2	0	1	0
121	CAPEOX+BEV	1	1310	1	4.86364	319.697	0.454545	1026.23	1	1	1	0	1	0	73	0	19.8791	1	1	0	0	targeted therapy
122	CAPEOX	0	176	0	2.58871	133.871	0.145161	429.726	0	0	0	0	1	1	71	1	26.1719	2	0	0	0
123	CAPEOX+BEV	1	209	1	2.98438	176.042	0.260417	1008.72	1	0	1	0	1	1	70	0	24.3496	1	0	1	0
124	CAPEOX+BEV	1	1312	0	1.12865	96.4912	0.111111	186.228	0	0	0	0	0	0	67	0	19.1953	1	1	1	0
125	CAPEOX	0	1271	0	0.64977	84.7926	0.0921659	119.558	0	0	0	0	0	1	58	0	22.5827	1	0	1	0
126	CAPEOX+BEV	1	1264	0	3.46957	286.087	0.373913	1141.49	1	1	1	0	1	1	72	1	22.3214	1	1	0	0
127	CAPEOX+BEV	1	1048	1	4.32836	229.851	0.522388	1333.13	1	1	1	0	0	1	47	1	22.4913	1	0	0	0	chemotherapy+targeted Therapy
128	CAPEOX+BEV	1	540	1	3.27517	138.926	0.248322	677.96	1	0	1	0	1	1	76	1	25.5882	1	1	1	0	targeted therapy	chemotherapy+targeted Therapy
129	CAPEOX+BEV	1	198	1	12.625	922.5	0.775	4658.62	1	1	1	1	0	1	43	0	23.4375	1	0	0	0
130	CAPEOX	0	833	1	3.5035	137.762	0.265734	690.189	1	0	1	0	0	1	67	1	23.5294	2	1	1	0
131	CAPEOX+BEV	1	668	1	3.71852	211.852	0.407407	1063.5	1	1	1	0	1	1	74	1	26.2917	2	1	0	1
132	CAPEOX+BEV	1	541	1	11.7414	494.828	0.586207	3369.78	1	1	1	1	1	0	83	0	17.002	1	1	1	0
133	CAPEOX	0	516	0	5.39	303	0.37	1633.17	1	1	1	1	1	1	75	1	28.2284	0	1	0	0	chemotherapy+targeted Therapy
134	CAPEOX	0	92	1	2.52727	120	0.281818	333.6	0	0	1	0	1	1	74	0	20.0288	2	1	0	0
135	CAPEOX+BEV	1	1110	1	1.96104	92.2078	0.188312	278.468	0	0	0	0	0	1	58	0	29.3847	2	0	0	0
136	CAPEOX+BEV	1	1377	1	3.7957	243.011	0.311828	857.828	1	1	1	0	1	1	73	1	21.6263	1	0	0	0
137	CAPEOX+BEV	1	100	0	5.66972	268.807	0.724771	1661.23	1	1	1	1	0	1	53	1	20.0474	1	1	0	0
138	CAPEOX+BEV	1	516	0	3.89726	131.507	0.280822	748.274	1	0	1	0	1	1	69	1	22.7732	1	1	1	1
139	CAPEOX+BEV	1	820	1	2.71084	112.651	0.240964	506.928	0	0	1	0	0	1	49	1	21.6721	0	1	0	0	chemotherapy+targeted Therapy	chemotherapy+targeted Therapy
140	CAPEOX+BEV	1	1186	0	4.54918	200	0.442623	1110	1	1	1	0	1	0	72	1	18.6851	1	1	0	0
141	CAPEOX+BEV	1	1159	0	3.68345	206.475	0.323741	1057.15	1	1	1	0	0	1	55	1	25.9259	1	0	0	0	chemotherapy+targeted Therapy	chemotherapy+targeted Therapy
142	CAPEOX+BEV	1	884	0	1.72989	193.103	0.275862	581.241	0	1	1	0	0	1	63	1	22.1296	1	1	1	0	chemotherapy+targeted Therapy
143	CAPEOX+BEV	1	334	1	2.13966	121.788	0.201117	466.447	0	0	1	0	0	1	67	1	24.093	1	0	0	0
144	CAPEOX+BEV	1	1071	1	2.98347	161.983	0.487603	584.76	1	0	1	0	0	1	61	1	24.2215	1	1	1	0	chemotherapy+targeted Therapy	Immunotherapy
145	CAPEOX+BEV	1	927	1	1.58219	107.534	0.19863	248.404	0	0	0	0	0	1	67	1	27.7778	2	1	1	1
146	CAPEOX	0	1037	0	2.10811	120.541	0.324324	470.108	0	0	1	0	0	1	57	1	20.3383	0	0	1	0	chemotherapy+targeted Therapy	chemotherapy+targeted Therapy
147	CAPEOX	0	97	0	2.57895	170.175	0.368421	750.474	0	0	1	0	0	1	62	1	23.7954	2	1	1	1	chemotherapy
148	CAPEOX+BEV	1	575	1	3.49231	267.692	0.269231	1215.32	1	1	1	0	0	1	58	1	23.5294	1	1	0	0
149	CAPEOX	0	798	1	6.05063	301.266	0.632911	1440.05	1	1	1	1	1	0	70	1	17.301	0	1	0	0	chemotherapy+targeted Therapy
150	CAPEOX+BEV	1	507	1	1.33205	98.8417	0.169884	341.004	0	0	0	0	0	1	54	1	22.0188	1	0	1	0	chemotherapy+targeted Therapy	Targeted Therapy
151	CAPEOX+BEV	1	953	1	3.90152	193.182	0.386364	994.886	1	1	1	0	0	0	62	1	19.721	1	0	0	0	chemotherapy+targeted Therapy
152	CAPEOX+BEV	1	1164	0	1.79167	127.083	0.354167	327.875	0	0	1	0	1	1	72	0	23.634	1	1	1	1
153	CAPEOX	0	754	1	1.375	79.8913	0.146739	202.125	0	0	0	0	1	1	73	0	22.6562	1	1	0	0	chemotherapy+targeted Therapy
154	CAPEOX+BEV	1	774	1	2.59868	176.316	0.203947	696.447	0	0	1	0	1	1	71	1	22.0386	2	1	0	0
155	CAPEOX+BEV	1	1114	0	1.76879	206.936	0.184971	633.225	0	1	0	0	1	1	75	1	20.061	1	1	1	0	chemotherapy+targeted Therapy
156	CAPEOX+BEV	1	525	0	2.26396	139.594	0.15736	622.589	0	0	0	0	1	1	69	0	27.1094	1	1	1	1	Immunotherapy+targeted therapy
157	CAPEOX+BEV	1	774	1	2.69231	181.538	0.2	635.385	0	0	0	0	0	1	61	0	24.8047	1	1	1	1	chemotherapy	Targeted Therapy+Immunotherapy
158	CAPEOX+BEV	1	1047	0	2.05128	102.564	0.192308	328.205	0	0	0	0	0	1	67	1	21.9713	1	1	0	0
159	CAPEOX+BEV	1	375	0	1.85106	108.511	0.228723	377.617	0	0	1	0	0	1	53	1	24.5581	1	1	1	1
160	CAPEOX+BEV	1	1023	0	6.69474	167.368	0.484211	1064.46	1	0	1	0	1	1	73	1	25.7117	1	0	0	0	chemotherapy+targeted Therapy
161	CAPEOX	0	1010	0	2.08621	104.023	0.143678	377.603	0	0	0	0	1	1	76	1	23.8754	2	1	0	0
162	CAPEOX+BEV	1	871	1	1.6338	130.282	0.225352	302.254	0	0	1	0	0	0	67	1	19.6052	1	0	0	0	chemotherapy+targeted Therapy
163	CAPEOX	0	1025	0	10.2059	414.706	0.764706	1439.03	1	1	1	1	0	1	66	1	23.3887	0	0	1	0	chemotherapy
164	CAPEOX+BEV	1	1029	0	1.37143	215.238	0.180952	309.943	0	1	0	0	0	0	56	1	19.1358	1	0	1	0	chemotherapy+targeted Therapy
165	CAPEOX	0	990	0	2.22632	83.1579	0.236842	351.758	0	0	1	0	0	1	67	0	22.68	0	1	1	1	Immunotherapy
166	CAPEOX+BEV	1	552	0	2.61006	106.918	0.238994	443.711	0	0	1	0	0	1	49	1	23.5883	1	1	1	1
167	CAPEOX+BEV	1	812	1	1.7362	98.1595	0.184049	277.791	0	0	0	0	0	0	63	0	17.5781	1	0	1	0	chemotherapy+targeted Therapy
168	CAPEOX+BEV	1	378	0	1.475	169	0.115	498.55	0	0	0	0	1	1	76	0	22.7694	1	0	1	0
169	CAPEOX+BEV	1	299	1	2.92063	130.159	0.34127	478.984	1	0	1	0	1	1	79	1	25.9516	1	1	1	0
170	CAPEOX+BEV	1	46	1	5.66667	208.772	0.350877	674.333	1	1	1	0	1	1	70	1	23.1834	0	1	1	1
171	CAPEOX+BEV	1	970	0	1.53571	47.619	0.27381	122.857	0	0	1	0	1	1	74	0	23.7097	0	1	1	0	chemotherapy+targeted Therapy
172	CAPEOX+BEV	1	953	0	5.28421	273.684	0.515789	1373.89	1	1	1	0	0	0	53	1	19.5918	1	1	0	0
173	CAPEOX	0	919	0	3.98182	140.909	0.227273	617.182	1	0	1	0	0	1	59	1	25.7117	0	1	1	0	chemotherapy+targeted Therapy
174	CAPEOX	0	900	0	5.64835	257.143	0.395604	1321.71	1	1	1	0	1	1	68	1	20.7031	2	1	0	0
175	CAPEOX	0	918	0	2.58261	272.174	0.173913	808.357	0	1	0	0	0	0	48	0	20	0	1	1	0
176	CAPEOX+BEV	1	956	1	4.20792	245.545	0.316832	1043.56	1	1	1	0	0	1	64	1	26.5731	1	1	1	0	chemotherapy+targeted Therapy
177	CAPEOX+BEV	1	297	0	3.62842	150.82	0.273224	1001.44	1	0	1	0	0	1	63	1	20.0692	1	1	1	0
178	CAPEOX+BEV	1	183	0	2.90909	118.182	0.142857	529.455	1	0	0	0	1	1	69	0	23.9453	1	1	1	0
179	CAPEOX+BEV	1	119	0	6.47458	313.559	0.440678	1197.8	1	1	1	0	1	1	77	1	24.1322	1	1	1	1
180	CAPEOX+BEV	1	704	1	2.86486	137.162	0.236486	581.568	1	0	1	0	0	1	57	1	23.1837	1	0	0	0
181	CAPEOX+BEV	1	405	1	4.18812	265.347	0.366337	1122.42	1	1	1	0	0	1	64	1	24.1406	1	1	1	0	chemotherapy+targeted Therapy
182	CAPEOX	0	826	0	3.19298	173.684	0.307018	632.211	1	0	1	0	0	1	61	1	20.2812	0	1	0	0
183	CAPEOX	0	101	0	2.39623	175.943	0.212264	893.792	0	0	1	0	0	1	49	0	20.3857	1	0	0	0
184	CAPEOX+BEV	1	816	0	2.06	86.6667	0.18	267.8	0	0	0	0	0	1	66	1	22.0522	0	1	1	0	chemotherapy+targeted Therapy
185	CAPEOX+BEV	1	636	1	3.025	125	0.205	756.25	1	0	1	0	0	1	52	0	28.1969	1	1	0	0	chemotherapy+targeted Therapy	Targeted Therapy+Immunotherapy
186	CAPEOX+BEV	1	746	0	2.71642	182.09	0.253731	662.806	0	0	1	0	0	1	54	0	20.7756	1	1	1	1	chemotherapy+targeted Therapy
187	CAPEOX+BEV	1	765	0	2.78472	148.611	0.222222	595.931	0	0	1	0	0	1	63	1	25.1562	1	0	1	0
188	CAPEOX+BEV	1	266	0	2.81159	223.188	0.376812	432.986	1	1	1	0	1	1	73	1	25.0341	1	1	1	1
189	CAPEOX+BEV	1	716	0	2.8189	195.276	0.275591	699.087	1	1	1	0	0	1	59	1	22.1453	1	1	0	0	chemotherapy+targeted Therapy	chemotherapy+targeted Therapy
190	CAPEOX+BEV	1	704	0	1.42541	169.061	0.209945	436.177	0	0	1	0	0	0	64	1	19.1327	1	0	1	0
191	CAPEOX+BEV	1	707	0	6.55	295	0.45	1545.8	1	1	1	1	1	1	71	0	22.8928	0	1	1	0	chemotherapy+targeted Therapy	Targeted Therapy
192	CAPEOX+BEV	1	171	0	4.70093	188.785	0.271028	949.589	1	1	1	0	0	1	57	0	23.2335	0	0	1	1
193	CAPEOX	0	730	0	8.67769	342.975	0.842975	3601.24	1	1	1	1	0	1	59	1	20.0617	2	1	0	0	chemotherapy+targeted Therapy
194	CAPEOX	0	618	0	0.899441	104.469	0.223464	168.196	0	0	1	0	0	1	54	1	22.8624	1	1	1	0	chemotherapy+targeted Therapy	chemotherapy+targeted Therapy
195	CAPEOX	0	788	0	3.71084	220.482	0.253012	679.084	1	1	1	0	0	1	65	1	24.7934	1	0	0	0	chemotherapy+targeted Therapy	chemotherapy+targeted Therapy
196	CAPEOX+BEV	1	233	1	6.24862	188.95	0.61326	2137.03	1	1	1	1	0	1	58	0	21.6441	1	1	0	0
197	CAPEOX+BEV	1	138	1	2.82812	242.969	0.304688	879.547	1	1	1	0	1	1	69	1	22.8822	1	0	0	0
198	CAPEOX+BEV	1	29	1	3.3741	112.23	0.208633	526.36	1	0	1	0	1	1	72	0	28.1337	2	0	1	1
199	CAPEOX+BEV	1	181	0	5.18045	304.511	0.390977	2098.08	1	1	1	1	0	1	51	1	23.8017	1	1	0	0
200	CAPEOX+BEV	1	263	1	5.30282	322.535	0.415493	2428.69	1	1	1	1	1	0	71	1	16.2982	2	1	0	0
201	CAPEOX	0	101	0	1.74302	179.33	0.134078	559.508	0	0	0	0	0	1	66	1	22.6003	1	1	1	0	chemotherapy+targeted Therapy
202	CAPEOX+BEV	1	120	0	2.55405	194.595	0.189189	367.784	0	1	0	0	1	1	70	0	21.0303	0	1	1	1
203	CAPEOX	0	824	1	1.80488	130.488	0.231707	386.244	0	0	1	0	1	1	71	1	21.9713	0	0	0	0	chemotherapy+targeted Therapy	chemotherapy+targeted Therapy
204	CAPEOX	0	599	0	1.49091	162.424	0.169697	399.564	0	0	0	0	1	1	73	0	22.6409	0	1	1	0
205	CAPEOX+BEV	1	433	1	5.96907	446.392	0.412371	2584.61	1	1	1	1	1	1	68	1	21.2245	1	0	1	0	chemotherapy+targeted Therapy
206	CAPEOX	0	201	1	3.16667	188.71	0.247312	1111.5	1	1	1	0	1	1	72	1	25.0995	2	1	0	0
207	CAPEOX+BEV	1	247	0	1.48344	105.96	0.165563	237.351	0	0	0	0	0	1	57	0	24.0346	1	1	1	1
208	CAPEOX+BEV	1	571	0	1.66854	52.809	0.106742	156.843	0	0	0	0	0	1	66	1	22.9568	1	0	1	0
209	CAPEOX+BEV	1	579	0	3.15426	100.532	0.271277	596.154	1	0	1	0	1	1	69	1	24.0346	1	0	1	0	chemotherapy+targeted Therapy
210	CAPEOX+BEV	1	111	0	2.7987	100.649	0.298701	433.799	0	0	1	0	1	1	68	1	20.8666	0	1	0	0
211	CAPEOX+BEV	1	361	0	1.875	97.9167	0.152778	264.375	0	0	0	0	0	0	39	0	15.0597	0	0	1	1
212	CAPEOX+BEV	1	524	0	1.91781	151.142	0.260274	634.795	0	0	1	0	0	0	62	0	17.2248	1	1	0	0
213	CAPEOX+BEV	1	523	0	4.17021	175.532	0.287234	688.085	1	0	1	0	0	1	57	1	23.03	0	0	0	0
214	CAPEOX+BEV	1	536	0	1.28188	108.054	0.120805	206.383	0	0	0	0	0	1	48	1	20.2422	1	1	1	0
215	CAPEOX+BEV	1	487	0	2.74265	158.824	0.25	592.412	0	0	1	0	1	1	68	1	22.6422	1	1	1	0
216	CAPEOX+BEV	1	382	0	1.16818	38.6364	0.245455	99.2955	0	0	1	0	1	1	75	1	22.6562	0	1	1	0
217	CAPEOX+BEV	1	472	0	2.77957	162.366	0.306452	839.43	0	0	1	0	0	1	67	1	23.1405	0	1	1	1	chemotherapy+targeted Therapy
218	CAPEOX	0	431	0	2.00637	121.656	0.159236	383.217	0	0	0	0	0	1	66	1	22.2291	1	0	1	0
219	CAPEOX+BEV	1	238	1	2	201.277	0.225532	946	0	1	1	0	0	1	67	1	20.984	2	1	1	1
220	CAPEOX+BEV	1	429	0	1.7907	164.341	0.271318	379.628	0	0	1	0	0	1	57	0	24.0346	1	1	0	0
221	CAPEOX	0	108	1	8.64035	326.316	0.447368	3214.21	1	1	1	1	0	0	59	0	17.9982	0	0	0	0	chemotherapy+targeted Therapy
222	CAPEOX+BEV	1	373	0	3.21552	187.931	0.413793	700.983	1	1	1	0	1	1	77	1	24.2215	0	0	1	0	chemotherapy+targeted Therapy
223	CAPEOX+BEV	1	344	0	6.73077	253.846	0.571429	3109.62	1	1	1	1	0	1	55	1	21.3841	2	1	0	0
224	CAPEOX+BEV	1	333	0	2.95946	72.973	0.310811	319.622	1	0	1	0	0	1	54	1	24.1588	0	1	1	0
225	CAPEOX+BEV	1	343	0	3.36943	133.121	0.197452	704.21	1	0	0	0	0	1	62	1	23.5666	0	1	1	0
226	CAPEOX+BEV	1	333	0	3.53191	218.085	0.239362	1448.09	1	1	1	1	0	1	65	0	22.4766	1	1	0	0
227	CAPEOX+BEV	1	340	0	1.98742	130.818	0.113208	413.384	0	0	0	0	0	1	64	0	22.8729	0	1	1	0
228	CAPEOX+BEV	1	223	0	1.9434	118.239	0.220126	365.358	0	0	1	0	1	1	74	1	29.0318	0	1	1	0
229	CAPEOX+BEV	1	325	0	4.06863	201.961	0.54902	838.137	1	1	1	0	1	1	77	1	20.0474	2	1	1	0	chemotherapy+targeted Therapy
230	CAPEOX+BEV	1	288	0	1.6859	198.718	0.141026	522.628	0	1	0	0	0	1	49	1	24.7405	0	1	1	0
231	CAPEOX+BEV	1	451	0	2.79487	178.205	0.205128	388.487	0	0	1	0	1	1	73	0	23.4107	0	1	1	0
